# Supplementary material
Source: publisher figshare collection journal article supplement (https://acs.figshare.com/ndownloader/files/4552048)

*Supplementary Information*

**New insights into the fundamental chemical nature of ionic liquid film formation on magnesium alloy surfaces**

Forsyth, Maria; Neil, Wayne; Howlett, Patrick; MacFarlane, Douglas;  
Hinton, Bruce; Rocher, Nathalie; Kemp, Thomas; Smith, Mark

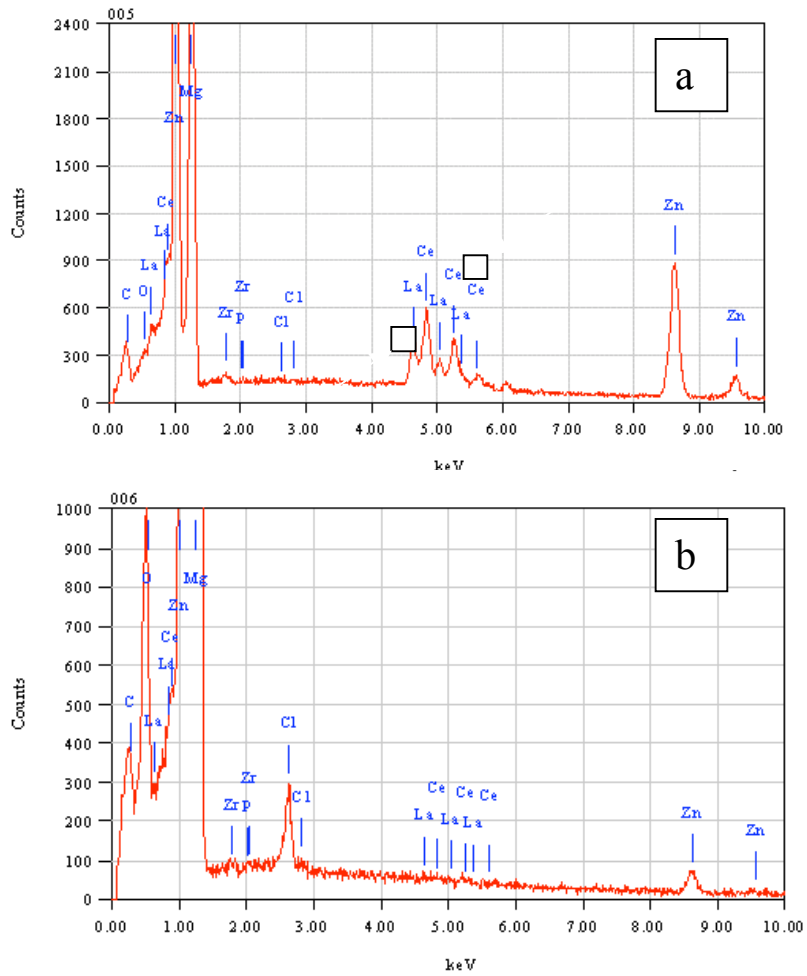

*S1: SEM EDX analyses from manuscript Figure 3 for (a) the intermetallic region and (b) neighbouring the grain boundary, which suggest that there is more IL interaction away from the grain boundary areas.*

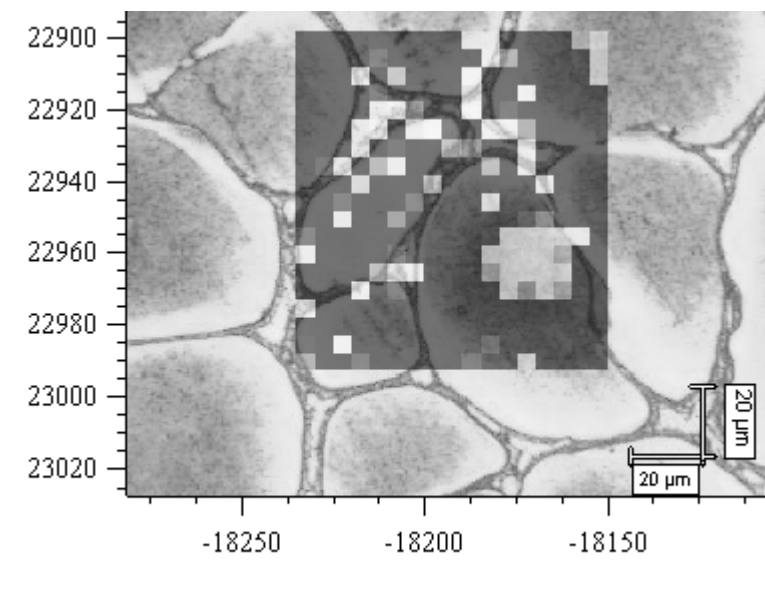

*S2: Raman map of ZE41 surface with a 48hr dpp treatment. Light coloured regions are where the peak at  $1280\text{ cm}^{-1}$ , which is indicative of where the phosphate group, is not present.*

S3.  $^{19}\text{F}$  Magic Angle Spinning NMR for pure IL, IL on  $\text{Al}_2\text{O}_3$  surface, IL on  $\text{Mg}(\text{OH})_2$  surface for the phosphonium bis(trifluoromethyl sulfonamide) IL.

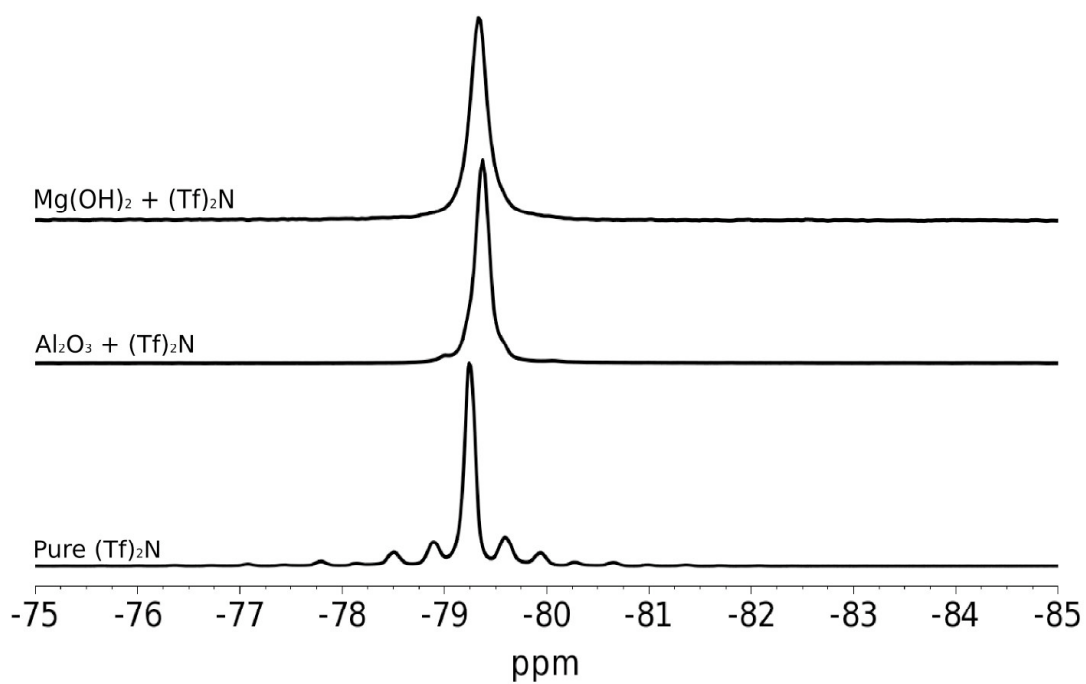

Supplement: Supplementary file 1 [file 4552048]
